# Supplementary material
Source: HighWire-hosted journal article supplement (https://injuryprevention.bmj.com/highwire/filestream/160004/field_highwire_adjunct_files/0/ip-2023-044862supp001_data_supplement.pdf)
Supplement: ip-2023-044862supp001_data_supplement.pdf [file ip-2023-044862supp001_data_supplement.pdf]

### **Supplementary File 1 - Important but Non-essential References, ordered by topic**

#### **National level drowning studies, non-United States**

Clemens T, Tamim H, Rotondi M, Macpherson AK. A population based study of drowning in Canada. *BMC Public Health*. 2016 Jul 13;16:559. <https://doi.org/10.1186/s12889-016-3221-8>

Nguyen H, Ivers RQ, Pham C, Jagnoor J. Trends of drowning mortality in Vietnam: evidence from the national injury mortality surveillance system. *Inj Prev*. 2020 Feb;26(1):42-48. <https://doi.org/10.1136/injuryprev-2018-043030>

Hills SP, Hobbs M, Tipton MJ, Barwood MJ. The water incident database (WAID) 2012 to 2019: a systematic evaluation of the documenting of UK drownings. *BMC Public Health*. 2021 Sep 27;21(1):1760. <https://doi.org/10.1186/s12889-021-11827-0>

Peden AE, Scarr JP, Mahony AJ. Analysis of fatal unintentional drowning in Australia 2008-2020: implications for the Australian Water Safety Strategy. *Aust N Z J Public Health*. 2021 Jun;45(3):248-254. <https://doi.org/10.1111/1753-6405.13124>

Rahman A, Alonge O, Bhuiyan AA, Agrawal P, Salam SS, Talab A, Rahman QS, Hyder AA. Epidemiology of Drowning in Bangladesh: An Update. *Int J Environ Res Public Health*. 2017 May 5;14(5):488. <https://doi.org/10.3390/ijerph14050488>

#### **Sub-national level drowning studies, non-United States**

Saunders CJ, Adriaanse R, Simons A, van Niekerk A. Fatal drowning in the Western Cape, South Africa: a 7-year retrospective, epidemiological study. *Inj Prev*. 2019;25(6):529-534. <https://doi.org/10.1136/injuryprev-2018-042945>

Matthews BL, Andrew E, Andronaco R, Cox S, Smith K. Epidemiology of fatal and non-fatal drowning patients attended by paramedics in Victoria, Australia. *Int J Inj Contr Saf Promot*. 2017;24(3):303-310. <https://doi.org/10.1080/17457300.2016.1175479>

Tellier É, Simonnet B, Gil-Jardiné C, Castelle B, Bailhache M, Salmi LR. Characteristics of drowning victims in a surf environment: a 6-year retrospective study in southwestern France. *Inj Epidemiol*. 2019;6:17. <https://doi.org/10.1186/s40621-019-0195-x>

#### **Recent national level drowning studies from the United States**

Ryan KM, Dugas J, Pina T, Maksimenko Y, Liu J. Drowning injuries in the United States: Patient characteristics, mortality risk, and associated primary diagnoses. *Injury*. 2020;51(11):2560-2564. <https://doi.org/10.1016/j.injury.2020.08.011>

Umapathi KK, Thavamani A, Dhanpalreddy H, Khatana J, Roy A. Incidence Trends and Predictors of In-Hospital Mortality in Drowning in Children and Adolescents in the United States: A National Inpatient Database Analysis. *Clin Pediatr*. 2020;59(2):134-141. <https://doi.org/10.1177/0009922819886871>

Theodorou CM, Rajasekar G, McFadden NR, Brown EG, Nuño M. Epidemiology of paediatric drowning hospitalisations in the USA: a population-based study [published online ahead of print, 2021 Aug 30]. *Inj Prev*. 2021;injuryprev-2021-044257.

<https://doi.org/10.1136/injuryprev-2021-044257>

Clemens T, Moreland B, Lee R. Persistent Racial/Ethnic Disparities in Fatal Unintentional Drowning Rates Among Persons Aged  $\leq 29$  Years - United States, 1999-2019. *MMWR Morb Mortal Wkly Rep*. 2021;70(24):869-874. Published 2021 Jun 18.

<https://doi.org/10.15585/mmwr.mm7024a1>

### California-specific drowning related research from the 1980s and 1990s

Frates RC Jr. Analysis of predictive factors in the assessment of warm-water near-drowning in children. *Am J Dis Child*. 1981;135(11):1006-1008.

<https://doi.org/10.1001/archpedi.1981.02130350010004>

Wintemute GJ, Kraus JF, Teret SP, Wright M. Drowning in childhood and adolescence: a population-based study. *Am J Public Health*. 1987;77(7):830-832.

<https://doi.org/10.2105/ajph.77.7.830>

Wintemute GJ, Teret SP, Kraus JF, Wright M. Alcohol and drowning: an analysis of contributing factors and a discussion of criteria for case selection. *Accid Anal Prev*. 1990;22(3):291-296. [https://doi.org/10.1016/0001-4575\(90\)90020-l](https://doi.org/10.1016/0001-4575(90)90020-l)

O'Carroll PW, Alkon E, Weiss B. Drowning mortality in Los Angeles County, 1976 to 1984. *JAMA*. 1988;260(3):380-383. Accessed 4 February 2022. Available from:

<https://pubmed.ncbi.nlm.nih.gov/3379748/>

Shinaberger CS, Anderson CL, Kraus JF. Young children who drown in hot tubs, spas, and whirlpools in California: a 26-year survey. *Am J Public Health*. 1990;80(5):613-614.

<https://doi.org/10.2105/ajph.80.5.613>

Habib DM, Tecklenburg FW, Webb SA, Anas NG, Perkin RM. Prediction of childhood drowning and near-drowning morbidity and mortality. *Pediatr Emerg Care*.

1996;12(4):255-258. <https://doi.org/10.1097/00006565-199608000-00005>

Ellis AA, Trent RB. Swimming pool drownings and near-drownings among California preschoolers. *Public Health Rep*. 1997;112(1):73-77. Accessed 4 February 2022.

Available from: <https://www.ncbi.nlm.nih.gov/pmc/articles/PMC1381843/>

Morgenstern H, Bingham T, Reza A. Effects of pool-fencing ordinances and other factors on childhood drowning in Los Angeles County, 1990-1995. *Am J Public Health*.

2000;90(4):595-601. <https://doi.org/10.2105/ajph.90.4.595>

### California's regions and waterways

California Complete Count Office. State of California. Regions, 2021. Accessed 10 August, 2021. Accessed 22 January 2022. Available from: <https://census.ca.gov/regions/>

National Oceanic and Atmospheric Administration (NOAA). Shoreline Mileage Of the United States. Office for Coastal Management, NOAA; 1975. Accessed 22 January 2022.

Available from: <https://coast.noaa.gov/data/docs/states/shorelines.pdf>

US Forest Service. Rivers in California. National Wild and Scenic Rivers System. Accessed 22 January 2022. Available from: <https://www.rivers.gov/california.php>

Mariotti, T. Swimming Pool Statistics 2023. Ruby Home Luxury Real Estate. Accessed 6 March 2023. Available from: <https://www.rubyhome.com/blog/swimming-pool-stats/>

### Surveillance tools and datasets

California Department of Public Health. Epi Center California Injury Data [Online]. Save and Active Communities Branch, California Department of Public Health. 2010. Accessed 22 December 2021. Available from: <https://epicenter.cdph.ca.gov/ReportMenus/CustomTables.aspx>

California Department of Public Health (CDPH). California Comprehensive Death File (Static), [2005 – 2013]. Compiled 18 August 2021.

California Department of Public Health (CDPH). California Comprehensive Master Death File (Static), [2014 – 2019]. Compiled 18 August 2021.

Centers for Disease Control and Prevention. Web-based injury statistics query and reporting system (WISQARS) [Online]. National Center for Injury Prevention and Control, Centers for Disease Control and Prevention (producer); 2003. Accessed 22 December 2021. Available from: [www.cdc.gov/ncipc/wisqars](http://www.cdc.gov/ncipc/wisqars)

Day JC. Population projections of the United States by age, sex, race, and Hispanic origin: 1995 to 2050, U.S. Bureau of the Census, Current Population Reports, P25–1130, U.S. Government Printing Office, Washington. 1996. Accessed 9 March 2023. Available from: <https://www.census.gov/content/dam/Census/library/publications/1996/demo/p25-1130.pdf>

United States Department of Health and Human Services. Multiple Cause of Death 1999–2019 on CDC WONDER Online Database, released 2020. National Center for Health Statistics (NCHS), Centers for Disease Control and Prevention (CDC). Accessed 22 December 2021. Available from: <https://wonder.cdc.gov/wonder/help/mcd.html>

U.S. Census Bureau. (2012). *2009–2011 American Community Survey 3-year Public Use Microdata Samples* [SAS Data file]. Accessed 22 October 2021. Available from: <https://factfinder.census.gov/faces/nav/jsf/pages/searchresults.xhtml?refresh=t>

### Death certificate and cause of death reporting

California Health and Human Services Agency (CHHS). Data De-identification Guidelines, Version 2.1. California Department of Health Care Services; 2016. Accessed 22 December 2021. Available from: [https://www.dhcs.ca.gov/dataandstats/Documents/DHCS-DDG-V2.1-010821%20\(1\).pdf](https://www.dhcs.ca.gov/dataandstats/Documents/DHCS-DDG-V2.1-010821%20(1).pdf)

Centers for Disease Control and Prevention (CDC). Medical examiners' and coroners' handbook on death registration and fetal death reporting. National Center for Health Statistics, Centers for Disease Control and Prevention, Department of Health and Human Services; 2003. Accessed 22 September 2021. Available from: [https://www.cdc.gov/nchs/data/misc/hb\\_me.pdf](https://www.cdc.gov/nchs/data/misc/hb_me.pdf)

Centers for Disease Control and Prevention (CDC). Instructions for Classification of Underlying and Multiple Causes of Death Instruction Manual. National Center for Health Statistics, Centers for Disease Control and Prevention, Department of Health and Human Services; 2018. Accessed 22 September 2021 <https://www.cdc.gov/nchs/nvss/manuals/2a-sectioni-2021.htm>

World Health Organization (WHO). International classification of diseases and related health problems, 10<sup>th</sup> revision. Geneva: World Health Organization; 2007. Available from: <http://www.who.int/classifications/apps/icd/icd10online>.

Wall MM, Huang J, Oswald J, McCullen D. Factors associated with reporting multiple causes of death. *BMC Med Res Methodol*. 2005;5(1):4. Published 2005 Jan 17. <https://doi.org/10.1186/1471-2288-5-4>

#### **Analysis software and methods**

R Core Team. R: A language and environment for statistical computing. R Foundation for Statistical Computing, Vienna, Austria. 2021. Available from: <https://www.R-project.org/>.

RStudio Team. RStudio: Integrated Development for R. RStudio, PBC, Boston, MA. 2020. Available from: <http://www.rstudio.com/>

Klein RJ. Age adjustment using the 2000 projected US population. Department of Health & Human Services, Centers for Disease Control and Prevention, National Center for Health Statistics; 2001. Accessed 7 March 2023. Available from: <https://www.cdc.gov/nchs/data/statnt/statnt20.pdf>

Stevenson, M., Stevenson, M. M., & BiasedUrn, I. epiR: Tools for the Analysis of Epidemiological Data. R package version 2.0.19. 2021. Available from: <https://CRAN.R-project.org/package=epiR>

Tableau Desktop V 2021.2 (Computer Software. Seattle, Washington. Available from: <https://www.tableau.com/products/desktop/download>

Walker K, Eberwein K, Herman M. Tidy census: Load us census boundary and attribute data as "tidyverse" and "sf" - ready data frames. *R package version 09*. 2018;6. 2021. Available from: <https://cran.r-project.org/web/packages/tidycensus/index.html>

Ulm K. Simple method to calculate the confidence interval of a standardized mortality ratio (SMR). *Am J Epidemiol*. 1990;131(2):373-375.
